# Supplementary material
Source: Springer Nature journal article supplement (https://www.springermedizin.de/resource/supplementary/12986_2014_622_MOESM3_ESM.pdf/25655168)

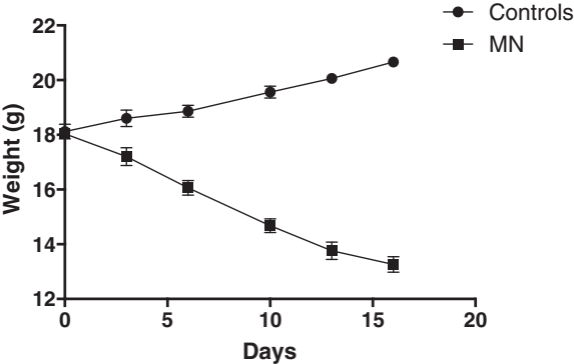

Supplement: MOESM3 [file 25655168]
